# Supplementary material for: Discovery and characterization of a marine bacterial SAM-dependent chlorinase
Source: Springer Nature journal article supplement (doi:10.1038/nchembio.2007.56), 2007-12-02
Supplement: 41589_2008_BFnchembio200756_MOESM3_ESM.mol [file 41589_2008_BFnchembio200756_MOESM3_ESM.mol]

  Chem3D  11090715483D

 50 52  0  0  0  0  0  0  0  0999 V2000
    1.7264    1.4901    3.1318 C   0  0  0  0  0  0  0  0  0  0  0  0
    1.7377    0.0936    3.0409 C   0  0  0  0  0  0  0  0  0  0  0  0
    2.9146   -0.6084    2.9952 N   0  0  0  0  0  0  0  0  0  0  0  0
    4.0114    0.1366    3.0411 C   0  0  0  0  0  0  0  0  0  0  0  0
    4.1046    1.4949    3.1200 N   0  0  0  0  0  0  0  0  0  0  0  0
    2.9625    2.2100    3.1687 C   0  0  0  0  0  0  0  0  0  0  0  0
    0.4276    1.9762    3.1584 N   0  0  0  0  0  0  0  0  0  0  0  0
   -0.3518    0.9247    3.0890 C   0  0  0  0  0  0  0  0  0  0  0  0
    0.4037   -0.2114    3.0040 N   0  0  0  0  0  0  0  0  0  0  0  0
    2.9150    3.5750    3.2384 N   0  0  0  0  0  0  0  0  0  0  0  0
   -0.0839   -1.5961    2.8895 C   0  0  2  0  0  0  0  0  0  0  0  0
    0.6740   -2.2752    1.9067 O   0  0  0  0  0  0  0  0  0  0  0  0
   -0.0122   -2.2165    0.6834 C   0  0  1  0  0  0  0  0  0  0  0  0
   -1.3520   -1.5566    0.9579 C   0  0  2  0  0  0  0  0  0  0  0  0
   -1.5260   -1.7687    2.4430 C   0  0  1  0  0  0  0  0  0  0  0  0
    0.8492   -1.5188   -0.3729 C   0  0  0  0  0  0  0  0  0  0  0  0
   -2.3732   -2.1876    0.2285 O   0  0  0  0  0  0  0  0  0  0  0  0
   -1.9511   -3.0955    2.6427 O   0  0  0  0  0  0  0  0  0  0  0  0
    0.2773   -1.7599   -2.0810 S   0  3  2  0  0  0  0  0  0  0  0  0
    1.7047   -1.0096   -2.9180 C   0  0  0  0  0  0  0  0  0  0  0  0
   -0.8923   -0.3897   -2.2947 C   0  0  0  0  0  0  0  0  0  0  0  0
   -1.5021   -0.3461   -3.7077 C   0  0  0  0  0  0  0  0  0  0  0  0
   -2.2823    0.9512   -3.9916 C   0  0  1  0  0  0  0  0  0  0  0  0
   -3.3082    1.1505   -2.9569 N   0  0  0  0  0  0  0  0  0  0  0  0
   -1.4558    2.2198   -4.1070 C   0  0  0  0  0  0  0  0  0  0  0  0
   -1.8951    3.3445   -4.0577 O   0  0  0  0  0  0  0  0  0  0  0  0
   -0.1464    1.9875   -4.3092 O   0  0  0  0  0  0  0  0  0  0  0  0
    4.9680   -0.4099    3.0000 H   0  0  0  0  0  0  0  0  0  0  0  0
   -1.4446    0.9490    3.0846 H   0  0  0  0  0  0  0  0  0  0  0  0
    1.9899    4.0697    3.2716 H   0  0  0  0  0  0  0  0  0  0  0  0
    3.8030    4.1338    3.2635 H   0  0  0  0  0  0  0  0  0  0  0  0
    0.0932   -2.0806    3.8773 H   0  0  0  0  0  0  0  0  0  0  0  0
   -0.1666   -3.2806    0.3745 H   0  0  0  0  0  0  0  0  0  0  0  0
   -1.3442   -0.4709    0.7159 H   0  0  0  0  0  0  0  0  0  0  0  0
   -2.2712   -1.1095    2.9321 H   0  0  0  0  0  0  0  0  0  0  0  0
    1.8683   -1.9735   -0.3299 H   0  0  0  0  0  0  0  0  0  0  0  0
    0.9665   -0.4372   -0.1357 H   0  0  0  0  0  0  0  0  0  0  0  0
   -2.7532   -2.8958    0.7545 H   0  0  0  0  0  0  0  0  0  0  0  0
   -2.1170   -3.2775    3.5686 H   0  0  0  0  0  0  0  0  0  0  0  0
    2.6035   -1.6487   -2.7686 H   0  0  0  0  0  0  0  0  0  0  0  0
    1.5202   -0.9339   -4.0118 H   0  0  0  0  0  0  0  0  0  0  0  0
    1.9287    0.0069   -2.5249 H   0  0  0  0  0  0  0  0  0  0  0  0
   -1.7219   -0.5212   -1.5666 H   0  0  0  0  0  0  0  0  0  0  0  0
   -0.3910    0.5705   -2.0415 H   0  0  0  0  0  0  0  0  0  0  0  0
   -0.7192   -0.4710   -4.4905 H   0  0  0  0  0  0  0  0  0  0  0  0
   -2.1901   -1.2183   -3.8267 H   0  0  0  0  0  0  0  0  0  0  0  0
   -2.8092    0.8551   -4.9725 H   0  0  0  0  0  0  0  0  0  0  0  0
   -3.7621    2.0740   -3.0700 H   0  0  0  0  0  0  0  0  0  0  0  0
   -4.0748    0.4627   -3.0544 H   0  0  0  0  0  0  0  0  0  0  0  0
    0.2978    2.8410   -4.4384 H   0  0  0  0  0  0  0  0  0  0  0  0
  1  2  2  0      
  6  1  1  0      
  1  7  1  0      
  2  3  1  0      
  9  2  1  0      
  3  4  2  0      
  4  5  1  0      
  4 28  1  0      
  5  6  2  0      
  6 10  1  0      
  7  8  2  0      
  8  9  1  0      
  8 29  1  0      
 11  9  1  0      
 10 30  1  0      
 10 31  1  0      
 11 12  1  0      
 15 11  1  0      
 11 32  1  0      
 12 13  1  0      
 13 14  1  0      
 13 16  1  0      
 13 33  1  0      
 14 15  1  0      
 14 17  1  0      
 14 34  1  0      
 15 18  1  0      
 15 35  1  0      
 16 19  1  0      
 16 36  1  0      
 16 37  1  0      
 17 38  1  0      
 18 39  1  0      
 19 20  1  0      
 21 19  1  0      
 20 40  1  0      
 20 41  1  0      
 20 42  1  0      
 22 21  1  0      
 21 43  1  0      
 21 44  1  0      
 23 22  1  0      
 22 45  1  0      
 22 46  1  0      
 23 24  1  0      
 25 23  1  0      
 23 47  1  0      
 24 48  1  0      
 24 49  1  0      
 25 26  2  0      
 25 27  1  0      
 27 50  1  0      
M  CHG  1  19   1
M  END
